# Supplementary material for: Phosphorus Concentration in Water Affects the Biofilm Community and the Produced Amount of Extracellular Polymeric Substances in Reverse Osmosis Membrane Systems
Source: MDPI journal article supplement (doi:10.3390/membranes11120928), 2021-11-26
Supplement: s1 [file s1]

## Article

# Phosphorus Concentration in Water Affects the Biofilm Community and the Produced Amount of Extracellular Polymeric Substances in Reverse Osmosis Membrane Systems

Luisa Javier <sup>1</sup>, Laura Pulido-Beltran <sup>1</sup>, Joop Kruithof <sup>2</sup>, Johannes S. Vrouwenvelder <sup>1,3</sup> and Nadia M. Farhat <sup>1,\*</sup>

<sup>1</sup> Water Desalination and Reuse Center (WDRC), Division of Biological and Environmental Science and Engineering (BESE), King Abdullah University of Science and Technology (KAUST), Thuwal 23955-6900, Saudi Arabia; luisa.javier@kaust.edu.sa (L.J.); laura.pulidobeltran@kaust.edu.sa (L.M.P.B.); johannes.vrouwenvelder@kaust.edu.sa (J.S.V.)

<sup>2</sup> Wetsus, European Centre of Excellence for Sustainable Water Technology, Oostergoweg 9, 8911 MA Leeuwarden, The Netherlands; joop.kruithof@planet.nl

<sup>3</sup> Faculty of Applied Sciences, Department of Biotechnology, Delft University of Technology, Van der Maasweg 9, 2629 HZ Delft, The Netherlands

\* Correspondence: nadia.farhat@kaust.edu.sa

## Supplementary material

**Table S1.** Elemental analysis of Tap water.

| Elements       | Tap water<br>µg/L |
|----------------|-------------------|
| Sodium (Na)    | 28600             |
| Calcium (Ca)   | 3600              |
| Potassium (K)  | 1930              |
| Magnesium (Mg) | 858.6             |
| Iron (Fe)      | 124.7             |
| Zinc (Zn)      | 74.4              |
| Aluminum (Al)  | 17.3              |
| Strontium (Sr) | 9.0               |
| Nickel (Ni)    | 4.8               |
| Lead (Pb)      | 2.5               |
| Gold (Au)      | 1.7               |
| Copper (Cu)    | 1.7               |
| Palladium (Pd) | 1.2               |
| Lithium (Li)   | 1.1               |
| Chromium (Cr)  | <0.001            |
| Cobalt (Co)    | ND                |
| Rubidium (Rb)  | 1.0               |
| Silver (Ag)    | 0.7               |
| Mercury (Hg)   | 0.5               |
| Scandium (Sc)  | 0.5               |
| Manganese (Mn) | 0.5               |
| Barium (Ba)    | 0.5               |
| Vanadium (V)   | 0.3               |
| Titanium (Ti)  | 0.2               |
| Beryllium (Be) | 0.2               |

---

|              |      |
|--------------|------|
| Cadmium (Cd) | 0.07 |
|--------------|------|

---

ND=Not determined.
